# Supplementary material for: Total energy expenditure is comparable between patients with and without diabetes mellitus: Clinical Evaluation of Energy Requirements in Patients with Diabetes Mellitus (CLEVER-DM) Study
Source: PubMed Central journal article supplement — BMJ Open Diabetes Res Care. 2019 Mar 25;7(1):e000648. doi: 10.1136/bmjdrc-2019-000648 (PMC6501857; doi:10.1136/bmjdrc-2019-000648), 2019-03-25
Supplement: bmjdrc-2019-000648supp002.pdf [file bmjdrc-2019-000648supp002.pdf]

Supplemental Fig 1.

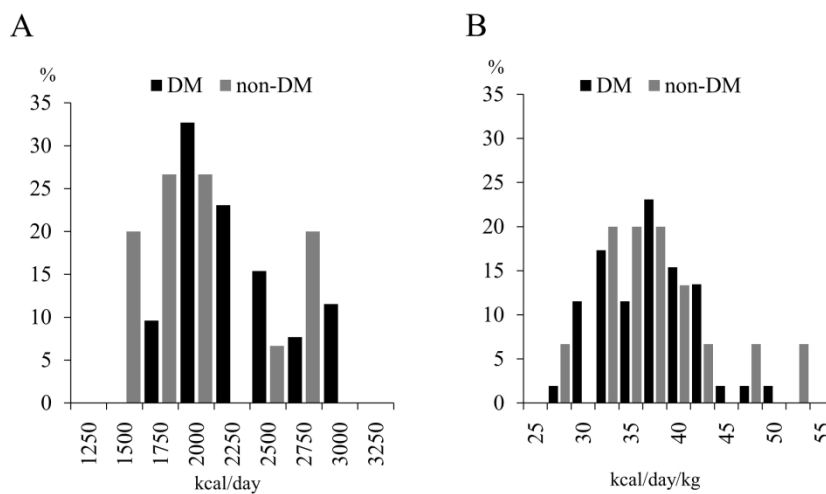

**Supplemental Fig 1.** Distribution of TEE and TEE/ideal body weight  
 A. The distribution of TEE. Black bar indicates DM-group (n = 52). Graybar indicates non-DM group (n = 15).  
 B. The distribution of TEE/kg ideal body weight.

Supplemental Figure 1

254x190mm (300 x 300 DPI)
